# Supplementary material for: Predicting gridded winter PM 2.5 concentration in the east of China
Source: Copernicus journal article supplement (doi:10.5194/acp-22-11173-2022), 2022-09-01
Supplement: Supplementary file 1 [file acp-22-11173-2022-supplement.pdf]

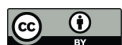

*Supplement of*

## **Predicting gridded winter PM<sub>2.5</sub> concentration in the east of China**

**Zhicong Yin et al.**

*Correspondence to:* Zhicong Yin (yinzhc@nuist.edu.cn)

The copyright of individual parts of the supplement might differ from the article licence.

1 **Supplementary Materials**

2 **Table S1: The predictors for each PC and associated statistical models.**

|     |                                                                                      | model                                                         |
|-----|--------------------------------------------------------------------------------------|---------------------------------------------------------------|
| PC1 | x <sub>1</sub> Sep SST<br>Southwest Pacific (20.5 °–42.5 °S, 115.5 °–142.5 °W)       | y=−0.51x <sub>1</sub> −0.51x <sub>2</sub>                     |
|     | x <sub>2</sub> Oct SST<br>Sargasso Sea (30.5 °–40.5 °N, 45.5 °–60.5 °W)              |                                                               |
| PC2 | x <sub>1</sub> Oct Soil moisture<br>Indo-China Peninsula (20 °–30 °N, 92.5 °–100 °E) | y=0.55x <sub>1</sub> −0.49x <sub>2</sub>                      |
|     | x <sub>2</sub> June-Aug SST<br>Gulf of Alaska (35 °–60 °N, 135 °–180 °W)             |                                                               |
| PC3 | x <sub>1</sub> Oct Snow depth<br>Eastern Siberia (57 °–70 °N, 110 °–170 °E)          | y=−0.32x <sub>1</sub> −0.23x <sub>2</sub> −0.48x <sub>3</sub> |
|     | x <sub>2</sub> Oct Sea ice<br>North to Barents Sea (82 °–90 °N, 45 °–130 °E)         |                                                               |
|     | x <sub>3</sub> Sep-Oct Soil moisture<br>India Peninsula (15 °–30 °N, 70 °–90 °E)     |                                                               |
| PC4 | x <sub>1</sub> Oct Sea ice<br>Chukchi Sea (73 °–77 °N, 160 °–180 °W)                 | y=−0.55x <sub>1</sub> +0.39x <sub>2</sub> −0.36x <sub>3</sub> |
|     | x <sub>2</sub> Oct Soil moisture<br>Kamchatka peninsula (60 °–67 °N, 160 °–178 °E)   |                                                               |
|     | x <sub>3</sub> Aug-Sep SST<br>Arabian Sea (25 °S–20 °N, 50 °–93 °E)                  |                                                               |

3

4

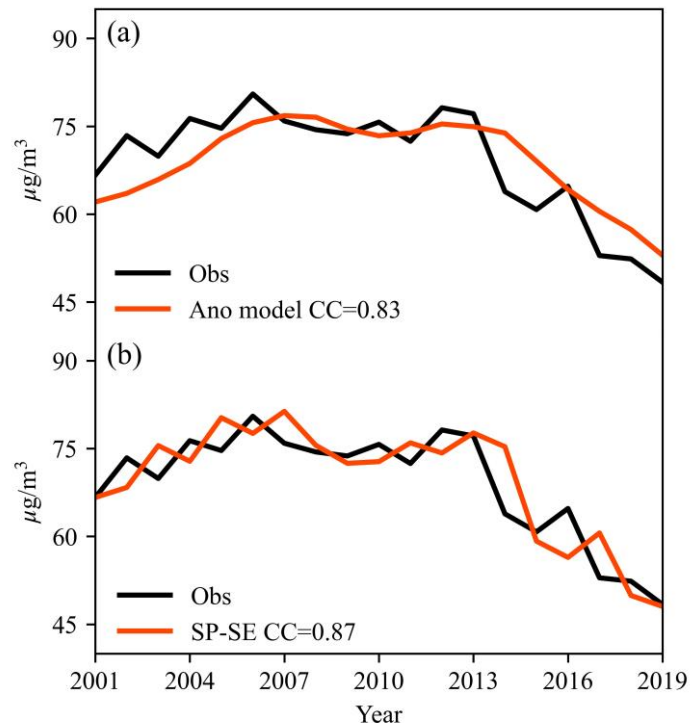

5

6 **Figure S1: Variation in the reanalysis (black) and predicted winter-mean PM<sub>2.5</sub> (orange) by anomaly model (a) and SP-SE (b) in**  
 7 **east of China from 2001 to 2019.**

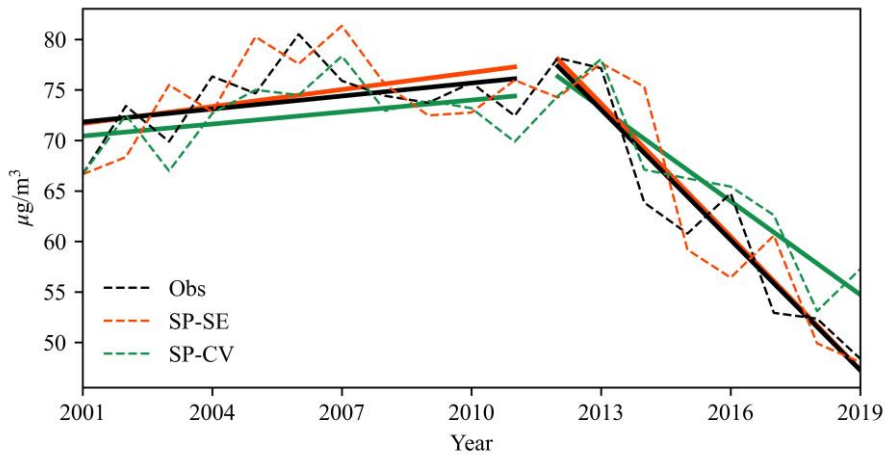

8

9 **Figure S2: Variation in the reanalysis (black) and predicted winter-mean PM<sub>2.5</sub> by SP-SE (orange) and SP-CV (green) in east of**  
 10 **China from 2001 to 2019. The solid lines indicate the linear trend during 2000-2011 and 2012-2019 respectively.**

11

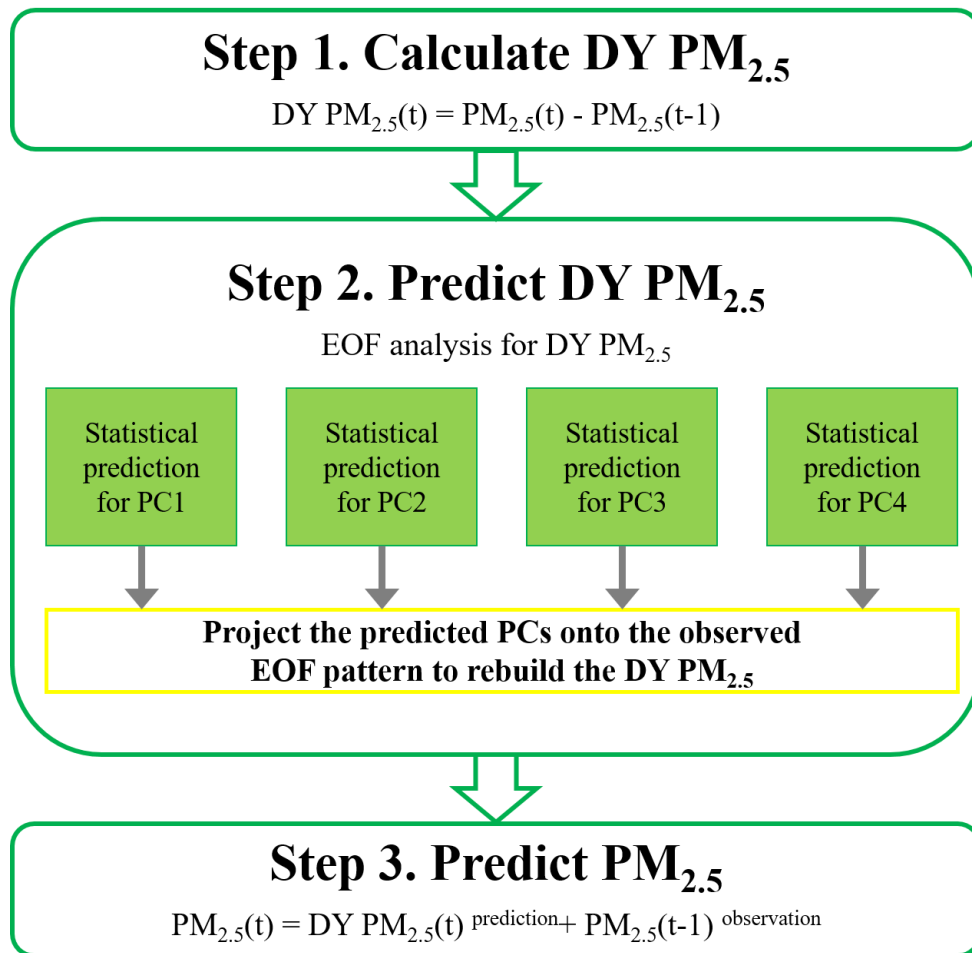

Figure S3: Flowchart of steps to build SP-CV model.

12  
 13  
 14  
 15

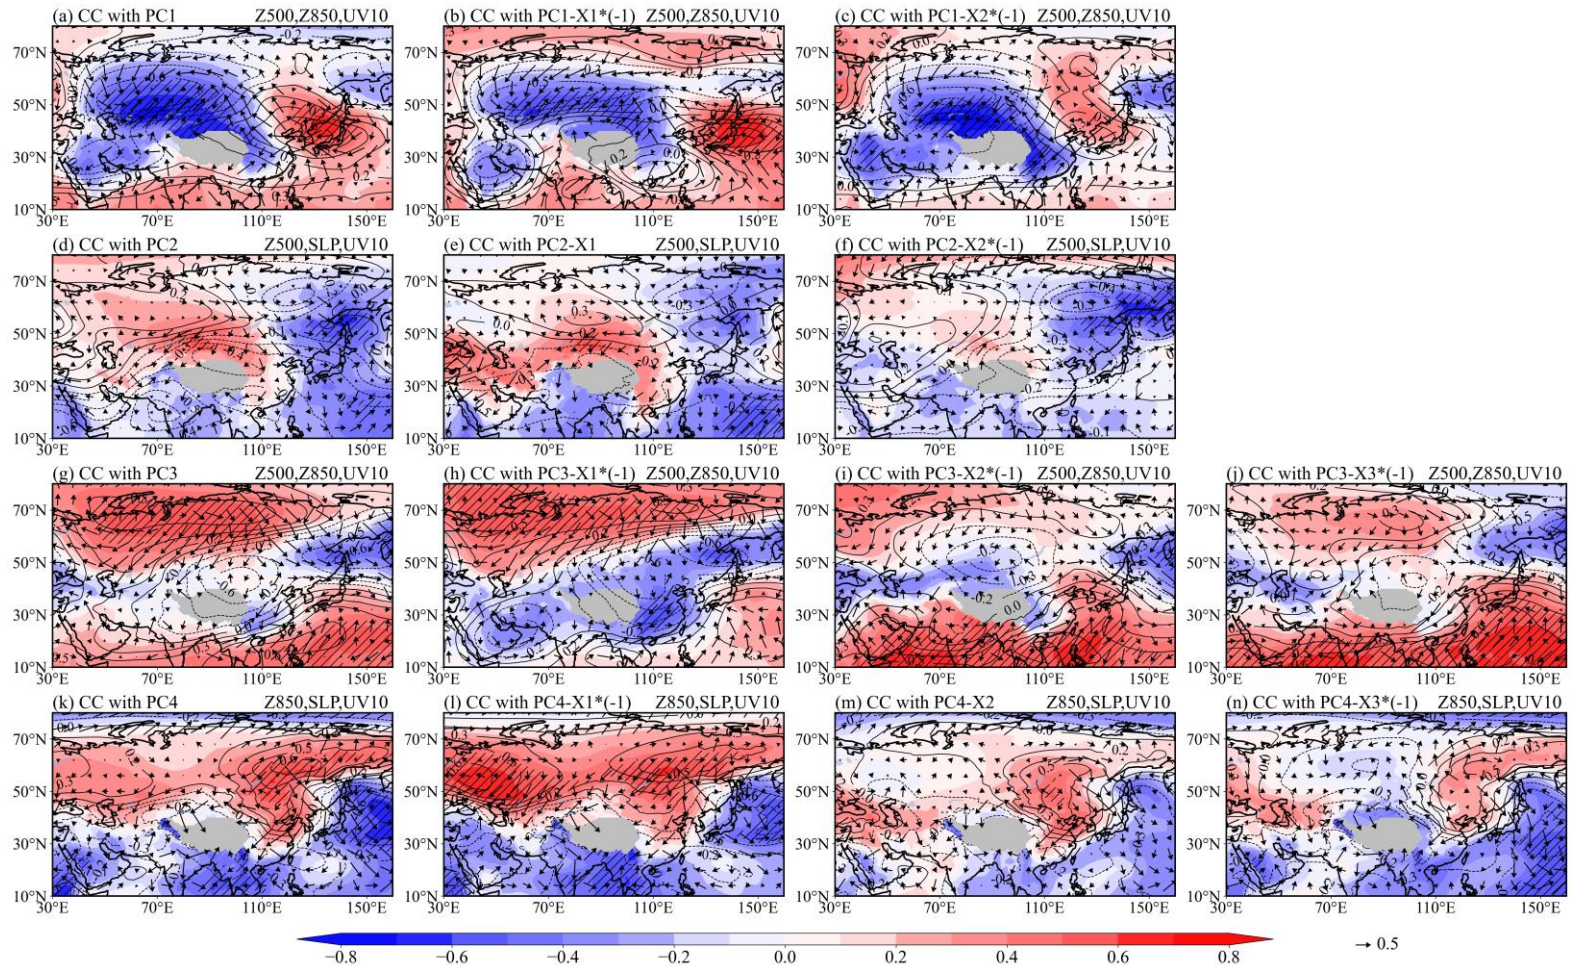

16

17 **Figure S4: Correlation coefficients between each predictand (a, d, g, k), their predictors: (b-c, e-f, h-j, l-n) and observed DY of atmospheric circulations**  
 18 **in winter. The atmospheric variables involved 10m wind (arrows in panel a-n), Z500 (contours in panel a-j) and Z850 (shading in panel a-c, g-j)**  
 19 **and contours in panel k-n) and SLP (shading in panel d-f and k-n). The predictor in panel (b, c, f, h-j, l, n) was multiplied by  $-1$  before calculating the correlation**  
 20 **coefficient. The slashes indicate CCs exceeding the 95% confidence level.**
